# Supplementary material for: Identification of sieve elements and companion cell protoplasts by a combination of brightfield and fluorescence microscopy
Source: PubMed Central journal article supplement — Appl Plant Sci. 2018 Sep 20;6(9):e01179. doi: 10.1002/aps3.1179 (PMC6159646; doi:10.1002/aps3.1179), 2018-09-20

**Appendix S1.** Citrus leaf sieve element protoplast viewed under different light sources and filters after incubation in 0.15  $\mu\text{M}$  Hoechst 3342, 100 nM MitoTracker, and 80  $\mu\text{M}$  Neutral Red for 15 min. Each cell was viewed under brightfield microscopy (A); fluorescence microscopy (Rhodamine filter; Ex: BP 545/25, Em: BP 525/50) for red and green fluorescence (B); and under DAPI filter (Hoechst 3342; Ex: G365, Em: BP 445/50) for blue fluorescence (C).

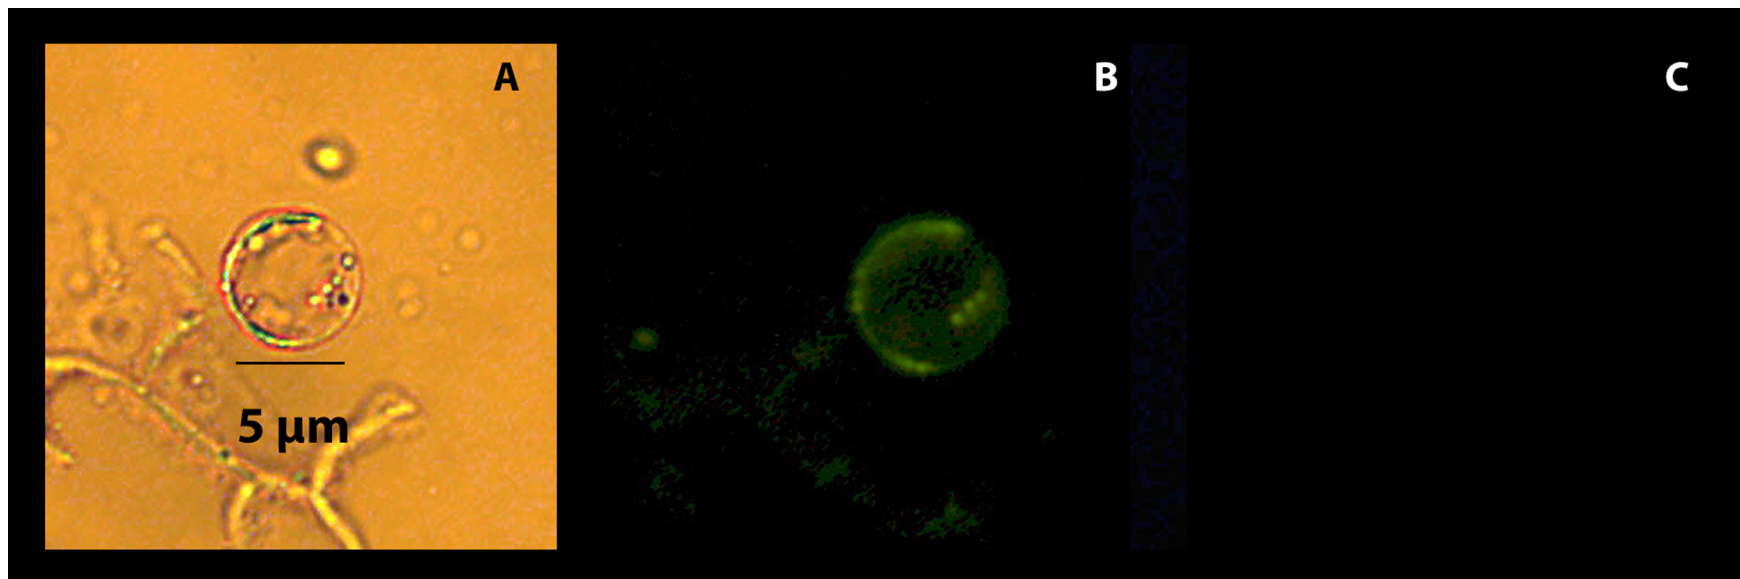

Supplement: APS3-6-e01179-s001.pdf [file APS3-6-e01179-s001.pdf]
